# Supplementary material
Source: Springer Nature journal article supplement (https://www.springermedizin.de/resource/supplementary/12874_2010_507_MOESM1_ESM.pdf/9432022)
Supplement: MOESM1 [file 9432022]

Table 1: Self-monitoring components - factors to be considered at each stage in the design of a self-monitoring intervention

| Stage          |                                                                                                                                                                                                              |                                                                                                                                                                                                                                                                                                                                                                                           |                                                                                                                                                                                                                      |                                                                                                                                                                                    |
|----------------|--------------------------------------------------------------------------------------------------------------------------------------------------------------------------------------------------------------|-------------------------------------------------------------------------------------------------------------------------------------------------------------------------------------------------------------------------------------------------------------------------------------------------------------------------------------------------------------------------------------------|----------------------------------------------------------------------------------------------------------------------------------------------------------------------------------------------------------------------|------------------------------------------------------------------------------------------------------------------------------------------------------------------------------------|
| Factor         | Education                                                                                                                                                                                                    | Self-measurement                                                                                                                                                                                                                                                                                                                                                                          | Adjustment/Adherence                                                                                                                                                                                                 | Health care professional contact                                                                                                                                                   |
| <b>Purpose</b> | <i>What is the purpose?</i> <ul style="list-style-type: none"> <li>To increase knowledge</li> <li>To provide skills</li> <li>To increase compliance</li> <li>To increase motivation</li> </ul>               | <i>What is the purpose?</i> <ul style="list-style-type: none"> <li>To provide information</li> <li>To increase compliance</li> <li>To increase motivation</li> </ul>                                                                                                                                                                                                                      | <i>What is the purpose?</i> <ul style="list-style-type: none"> <li>Titration of medication</li> <li>Titration of behaviour</li> <li>Adherence to medication regime</li> <li>Adherence to behaviour regime</li> </ul> | <i>What is the purpose?</i> <ul style="list-style-type: none"> <li>To provide education</li> <li>To increase compliance</li> <li>To increase motivation</li> <li>Safety</li> </ul> |
| <b>People</b>  | <i>Who receives the education?</i> <ul style="list-style-type: none"> <li>Patients</li> <li>Health care providers</li> </ul>                                                                                 | <i>Who is the information for?</i> <ul style="list-style-type: none"> <li>Patients</li> <li>Health care providers</li> </ul>                                                                                                                                                                                                                                                              | <i>Who adjusts/adheres?</i> <ul style="list-style-type: none"> <li>Patients</li> <li>Health care provider</li> </ul>                                                                                                 | <i>Which health professionals?</i> <ul style="list-style-type: none"> <li>Doctors</li> <li>Nurses</li> <li>Other</li> </ul>                                                        |
| <b>Content</b> | <i>What type of education?</i> <ul style="list-style-type: none"> <li>Theoretical basis</li> <li>Content</li> <li>Mode of delivery</li> <li>Support materials</li> </ul>                                     | <i>What test is to be used?</i> <ul style="list-style-type: none"> <li>Accuracy of the test</li> <li>Feasibility in this setting</li> </ul>                                                                                                                                                                                                                                               | <i>What is adjusted/adhered to?</i> <ul style="list-style-type: none"> <li>Medication</li> <li>Behaviour</li> </ul>                                                                                                  | <i>What is the format of the contact?</i> <ul style="list-style-type: none"> <li>Effectiveness</li> <li>Cost</li> </ul>                                                            |
| <b>Timing</b>  | <i>What timing is optimal?</i> <ul style="list-style-type: none"> <li>Should it be once off or repeated</li> <li>How long between sessions</li> <li>Is it sustainable</li> </ul>                             | <i>What timing is optimal?</i> <ul style="list-style-type: none"> <li>How long should the run in be</li> </ul> <i>What is the frequency of measurements and does it take account of:</i> <ul style="list-style-type: none"> <li>The signal to noise ratio</li> <li>Fatigue factor and compliance</li> </ul>                                                                               | <i>What is the frequency of adjustments considering:</i> <ul style="list-style-type: none"> <li>The signal to noise ratio</li> <li>Fatigue factor and compliance</li> </ul>                                          | <i>What is the timing of the contact?</i> <ul style="list-style-type: none"> <li>Feasibility</li> <li>Compliance</li> </ul>                                                        |
| <b>Other</b>   | <i>Should the learning be assessed?</i> <ul style="list-style-type: none"> <li>How many assessments</li> <li>What level of success before allowing self-measurement</li> <li>How much re-training</li> </ul> | <i>What quality assurance is required?</i> <ul style="list-style-type: none"> <li>Internal QA and External QA</li> <li>How often should QA be conducted?</li> </ul> <i>What is recorded?</i> <ul style="list-style-type: none"> <li>How reliable is the recording method</li> <li>How accurate is the recording method</li> <li>Is electronic recording available and feasible</li> </ul> | <i>What guidance is provided?</i> <ul style="list-style-type: none"> <li>Algorithm</li> <li>Web based guidance</li> <li>Clinician guidance</li> </ul>                                                                | <i>Other?</i> <ul style="list-style-type: none"> <li>Algorithm based contact</li> <li>Video conference</li> </ul>                                                                  |
